# Supplementary material for: Tunable genetic devices through simultaneous control of transcription and translation
Source: PubMed Central journal article supplement (PMC7190835; doi:10.1038/s41467-020-15653-7), 2020-04-29
Supplement: 41467_2020_15653_MOESM5_ESM.pdf [file 41467_2020_15653_MOESM5_ESM.pdf]

**Title:** Supplementary Data 1:

**Description:** Model of the TES in Systems Biology Markup Language (SBML) format.

**Title:** Supplementary Data 2:

**Description:** Annotated sequences for all plasmids in GenBank format.
